# Supplementary material for: Strategies to Enhance CO2 Electrochemical Reduction from Reactive Carbon Solutions
Source: MDPI journal article supplement (doi:10.3390/molecules28041951), 2023-02-18
Supplement: s1 [file s1]

## Electronic Supporting Information

### Strategies to enhance CO<sub>2</sub> electrochemical reduction from reactive carbon solutions

Carlos Larrea<sup>1</sup>, Juan Ramón Avilés-Moreno<sup>1</sup>, Pilar Ocón<sup>1\*</sup>

<sup>1</sup> Universidad Autónoma de Madrid (UAM), Departamento de Química Física Aplicada, C/Francisco Tomás y Valiente 7, 28049 Madrid, Spain

\* Correspondence: pilar.ocon@uam.es

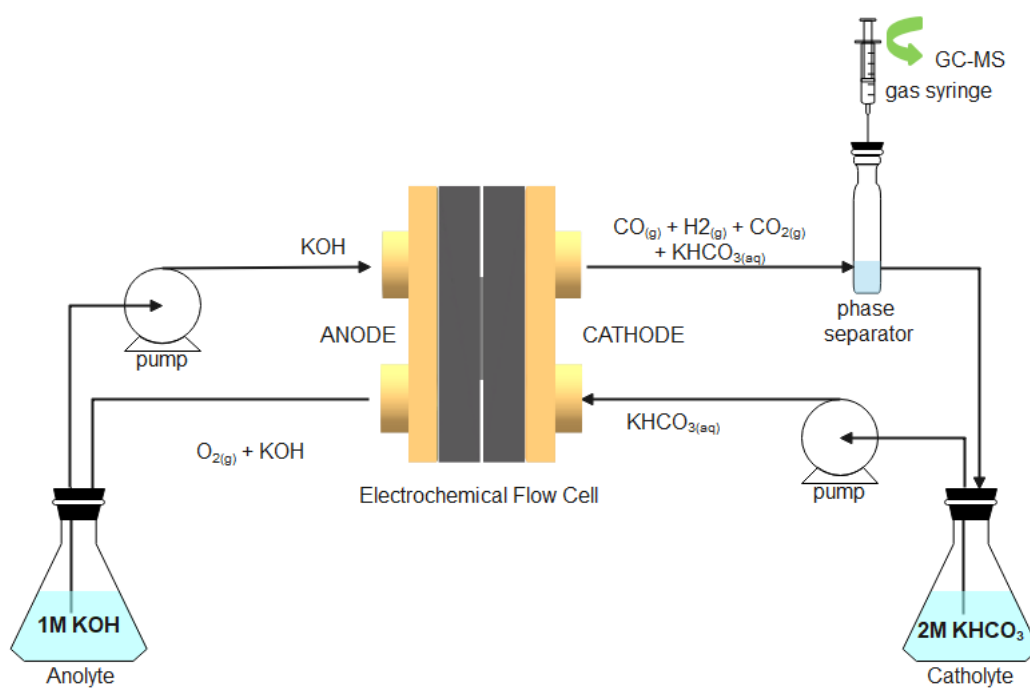

**Figure S1.** Schematic of CO<sub>2</sub>ER system with bicarbonate feed used for experiments.

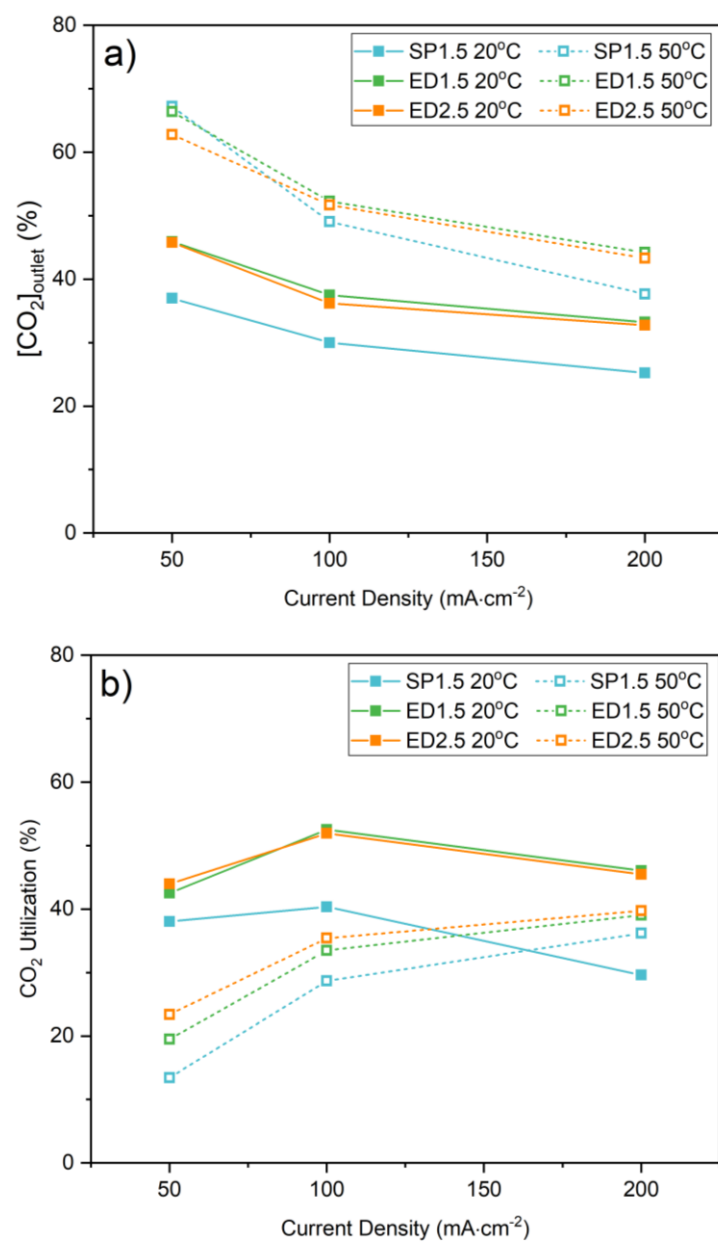

**Figure S2.** (a) Concentration of  $\text{CO}_2$  at the outlet and (b)  $\text{CO}_2$  Utilization for the 3 cathodes tested at 20 °C and 50 °C.

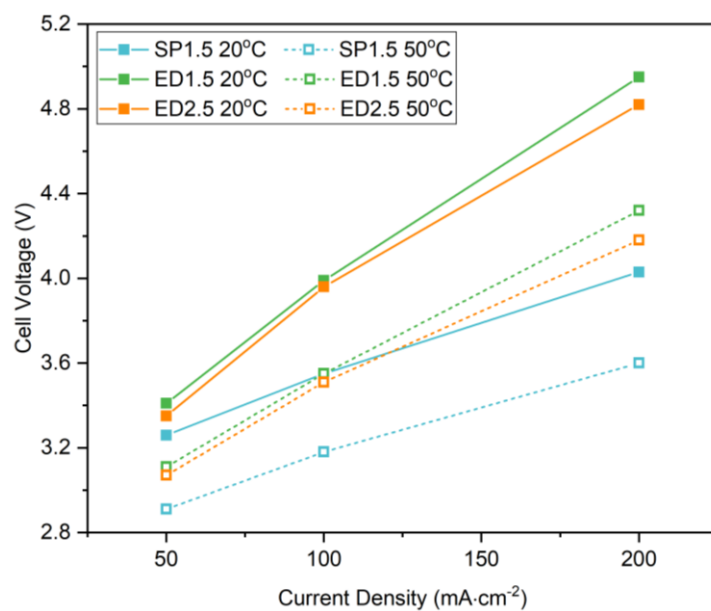

**Figure S3.** Cell voltage for the 3 cathodes tested at 20 °C and 50 °C.

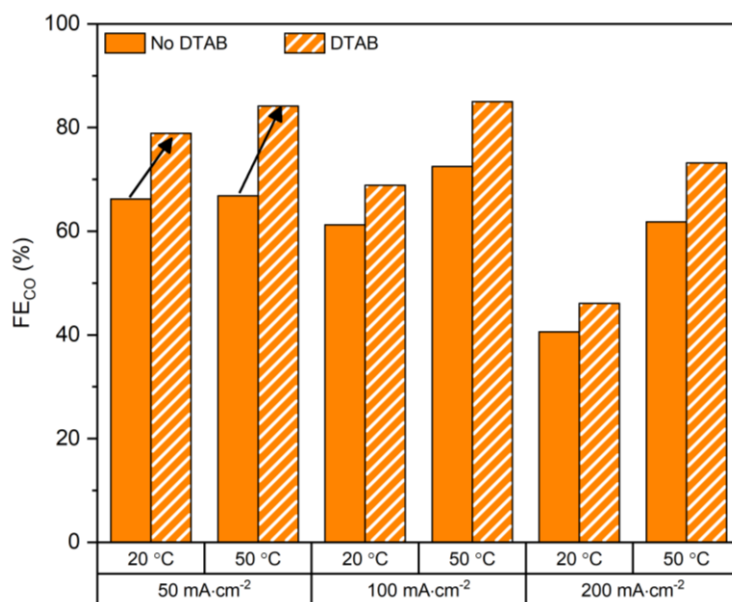

**Figure S4.** Faradaic efficiencies towards CO of system with ED2.5 cathode and catholyte with and without DTAB.

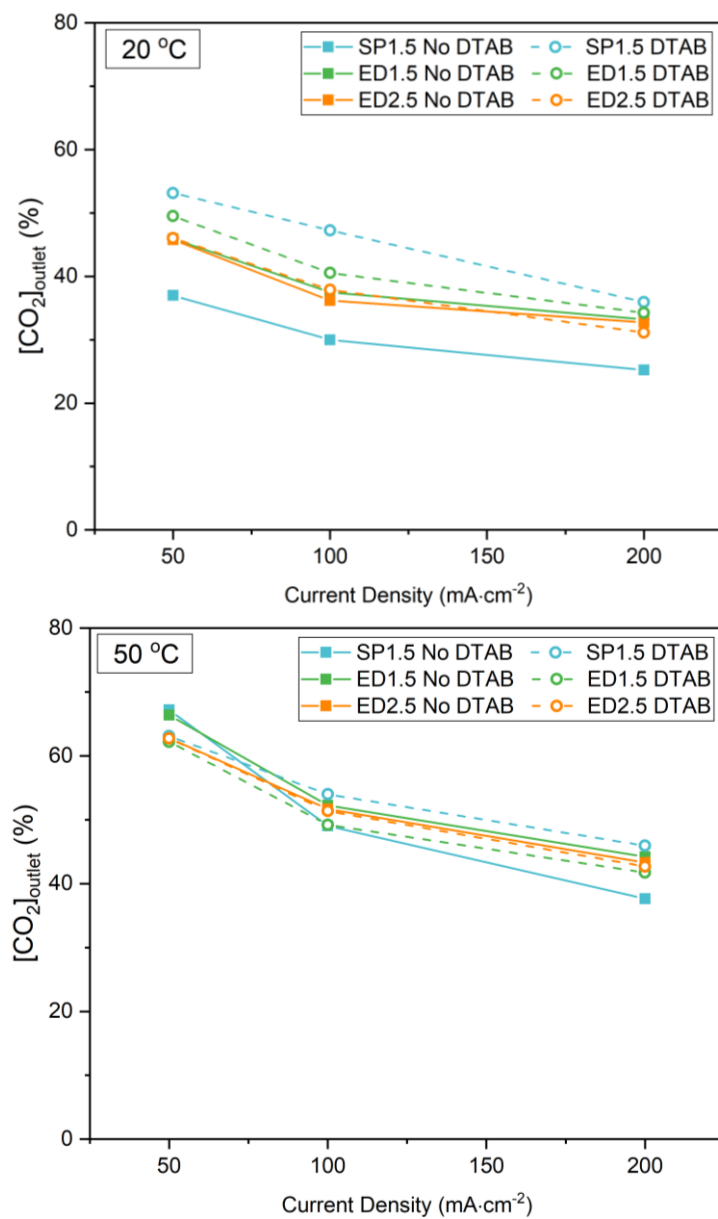

**Figure S5.** Concentration of CO<sub>2</sub> at the outlet for the 3 cathodes tested in system with catholyte with and without DTAB (a) 20 °C and (b) 50 °C.
